# Supplementary material for: Genetic and physiological mechanisms of freezing tolerance in locally adapted populations of a winter annual
Source: PubMed Central journal article supplement — Am J Bot. 2019 Nov 24;107(2):250–61. doi: 10.1002/ajb2.1385 (PMC7065183; doi:10.1002/ajb2.1385), 2019-11-24
Supplement: AJB2-107-250-s002.pdf [file AJB2-107-250-s002.pdf]

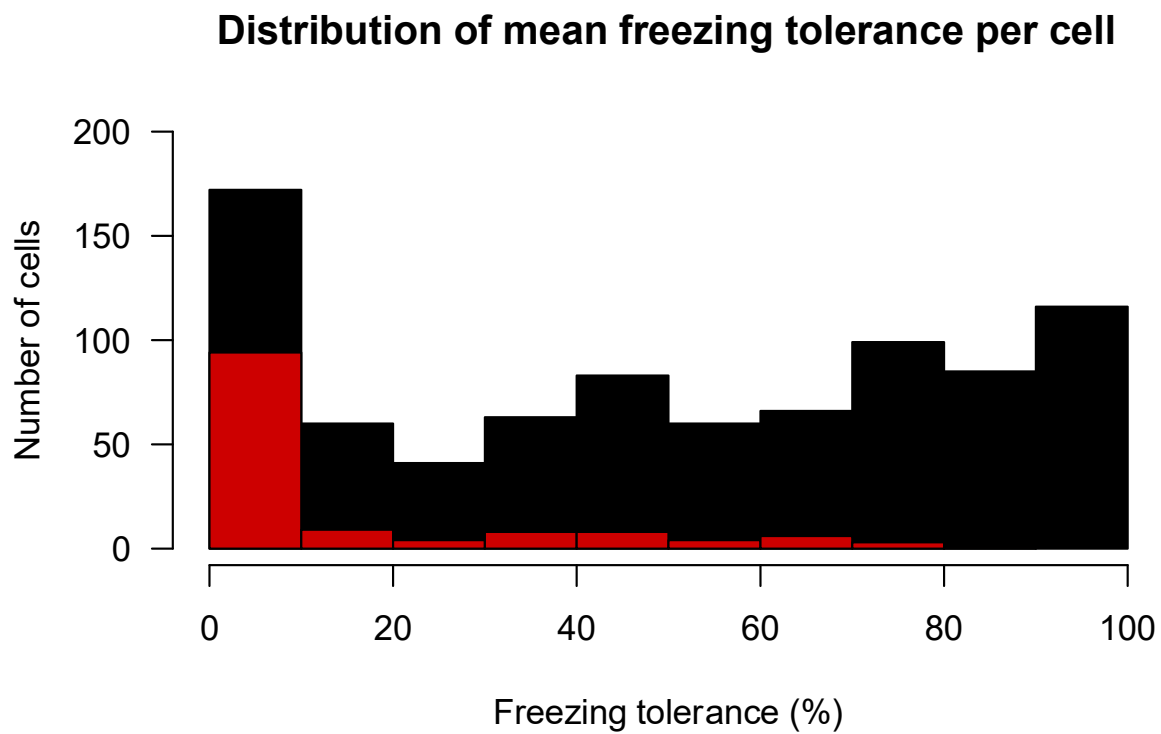

**Appendix S2.** Distribution of mean freezing-tolerance values per cell. The distribution of values for all six lines combined are given in black, and the distribution of values for just IT are given in red.
