# Supplementary material for: Genetic and physiological mechanisms of freezing tolerance in locally adapted populations of a winter annual
Source: PubMed Central journal article supplement — Am J Bot. 2019 Nov 24;107(2):250–61. doi: 10.1002/ajb2.1385 (PMC7065183; doi:10.1002/ajb2.1385), 2019-11-24
Supplement: AJB2-107-250-s012.pdf [file AJB2-107-250-s012.pdf]

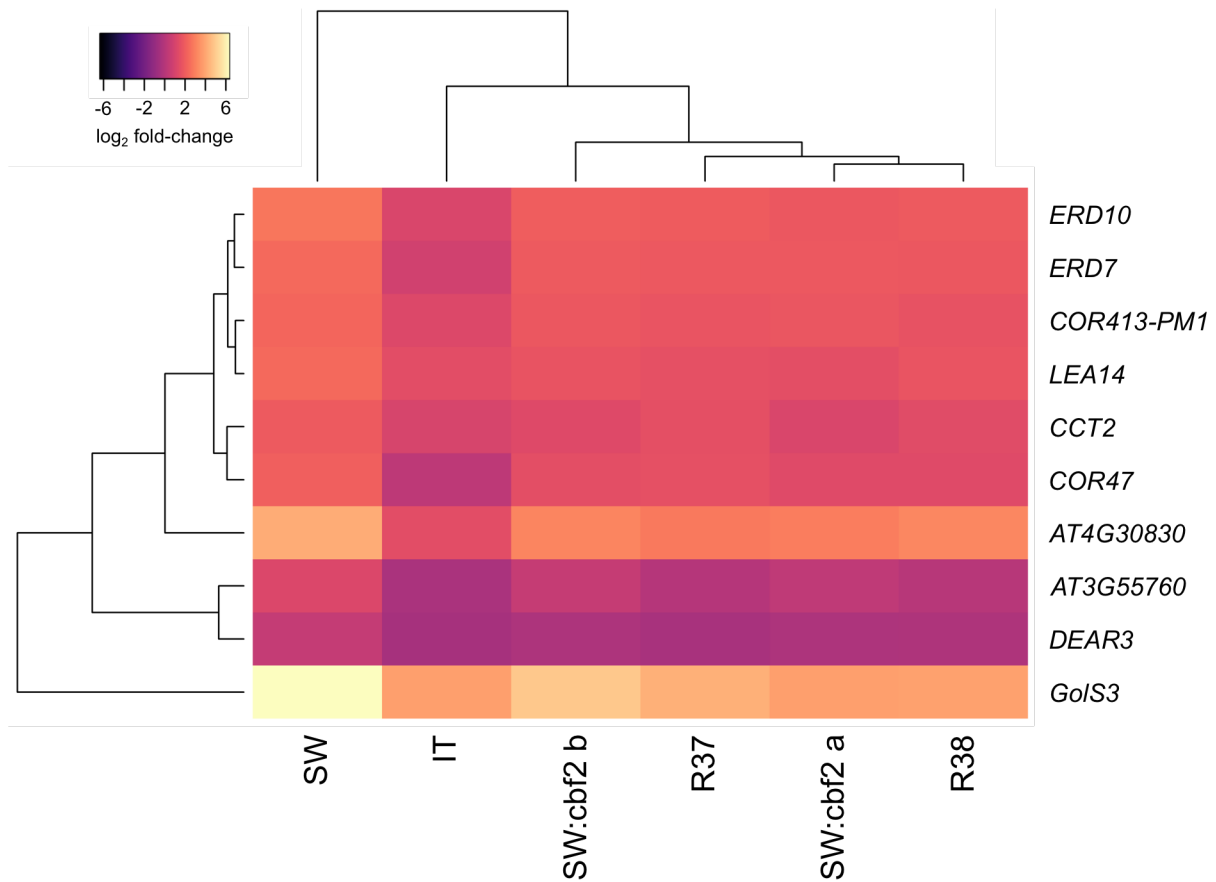

**Appendix S12.** Heat map of expression differences for the 10 genes that were identified as having a significant genotype by treatment interaction for all pairwise comparisons to SW. The value of each cell represents the log<sub>2</sub> fold-change in gene expression before and after cold acclimation (counts per million reads). Yellow-red color represents genes that are more highly expressed after cold acclimation, while black-purple color represents genes that are more highly expressed before cold acclimation. Plot was generated using the heatmap.2 function in the R package plots (Warnes et al., 2019).
