# Supplementary material for: Genetic and physiological mechanisms of freezing tolerance in locally adapted populations of a winter annual
Source: PubMed Central journal article supplement — Am J Bot. 2019 Nov 24;107(2):250–61. doi: 10.1002/ajb2.1385 (PMC7065183; doi:10.1002/ajb2.1385), 2019-11-24
Supplement: AJB2-107-250-s013.pdf [file AJB2-107-250-s013.pdf]

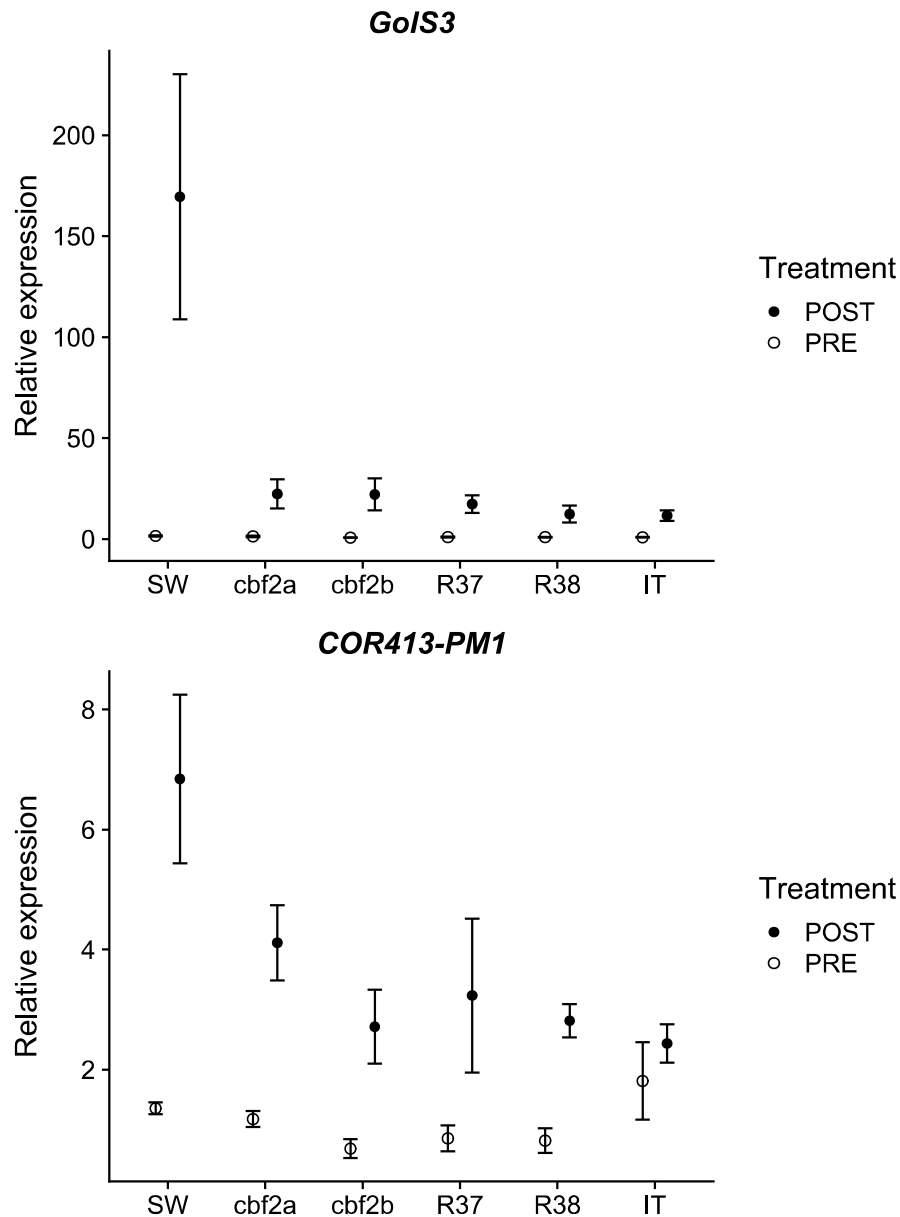

**Appendix S13.** Relative expression for *GolS3* and *COR413-PM1* quantified by RT-qPCR, normalized to expression of the housekeeping gene *ACT2*. PRE and POST refer to pre-acclimation and post-acclimation tissue collections, respectively. Each biological replicate was run in triplicate for three technical replicates. Points are means of three biological replicates, and error bars are the standard error of those means. Primer sequences used are as follows: *GolS3* F, 5-TGTGCCAAAGCTCCATCCGC-3; *GolS3* R, 5-TGGTGTGACAAGAACCTCGCT-3; *COR413-PM1* F, 5-TGCTGGCACATTCAGAGACAG-3; *COR413-PM1* R, 5-CAGACGGGGAAGACGACGAGA-3; *ACT2* F, 5-CTGGATCGGTGGTTCCATTC-3; *ACT2* R, 5-CCTGGACCTGCCTCATCATAC-3
