# Supplementary material for: Genetic and physiological mechanisms of freezing tolerance in locally adapted populations of a winter annual
Source: PubMed Central journal article supplement — Am J Bot. 2019 Nov 24;107(2):250–61. doi: 10.1002/ajb2.1385 (PMC7065183; doi:10.1002/ajb2.1385), 2019-11-24
Supplement: AJB2-107-250-s014.pdf [file AJB2-107-250-s014.pdf]

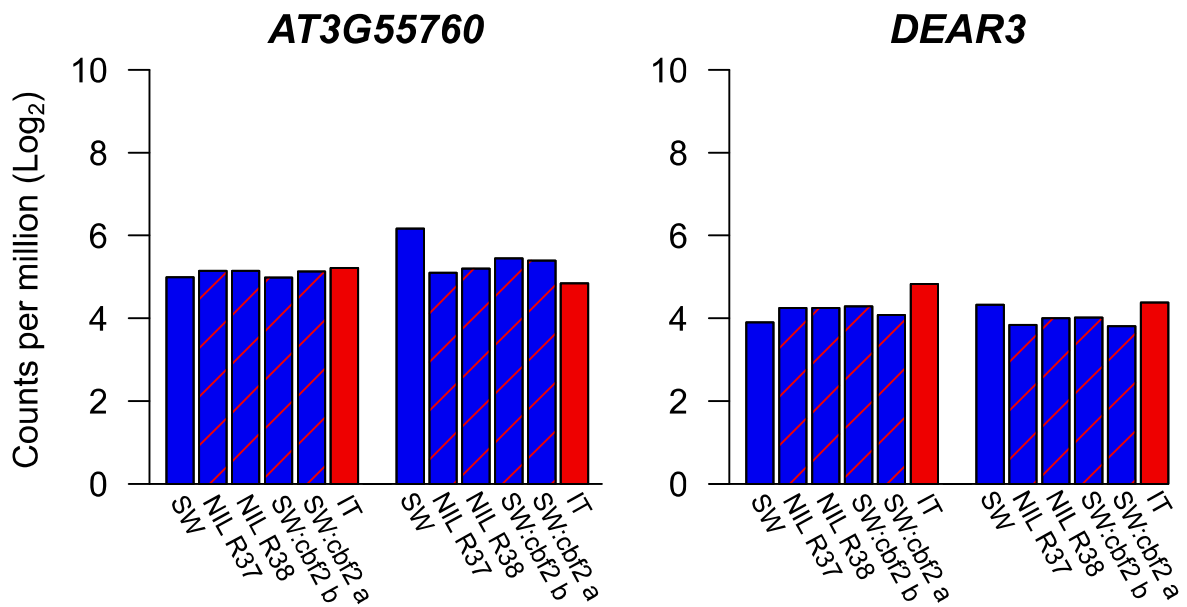

**Appendix S14.** Log<sub>2</sub> counts per million for the least responsive genes of the 10 candidates before (left group of bars) and after (right group of bars) cold acclimation.
